# Supplementary material for: Human breast milk as source of sphingolipids for newborns: comparison with infant formulas and commercial cow’s milk
Source: PubMed Central journal article supplement (PMC7734711; doi:10.1186/s12967-020-02641-0), 2020-12-14
Supplement: 12967_2020_2641_MOESM1_ESM.pdf [file 12967_2020_2641_MOESM1_ESM.pdf]

**Table X.** LC/MS-MS conditions for the analysis of ceramides, dihydroceramides and sphingomyelins

|                                |                                                                                                      |                |                |
|--------------------------------|------------------------------------------------------------------------------------------------------|----------------|----------------|
| <b>Analytical column</b>       | ACQUITY UPLC BEH C8 1.7 $\mu$ m 2.1x100mm                                                            |                |                |
| <b>Phase A</b>                 | 0.2% formic acid 2 mM ammonium formate water-solution                                                |                |                |
| <b>Phase B</b>                 | methanol 0.2% formic acid 1 mM ammonium formate                                                      |                |                |
| <b>LC gradient (%B)</b>        | 0-3 min (80-90%), 3-6 min (90%), 6-15 min (90-99%), 15-18 min (99%), 18-20 min (99-80%), 20-24 (80%) |                |                |
| <b>Flow (mL/min)</b>           | 0.3                                                                                                  |                |                |
| <b>Column temperature (°C)</b> | 30                                                                                                   |                |                |
| <b>Analytes</b>                | <b>MS/MS (m/z)</b>                                                                                   | <b>DP (eV)</b> | <b>CE (eV)</b> |
| Cer 12:0 (IS) <sup>1</sup>     | 482.7 > 264.4                                                                                        | 40             | 29.0           |
| Cer 14:0                       | 510.7 > 264.4                                                                                        | 40             | 29.5           |
| Cer 16:0                       | 538.8 > 264.4                                                                                        | 40             | 32.5           |
| Cer 18:1                       | 566.8 > 264.4                                                                                        | 40             | 34.5           |
| Cer 18:0                       | 564.8 > 264.4                                                                                        | 40             | 35.5           |
| Cer 20:0                       | 594.8 > 264.4                                                                                        | 40             | 36.0           |
| Cer 22:0                       | 622.9 > 264.4                                                                                        | 40             | 37.5           |
| Cer 24:1                       | 650.9 > 264.4                                                                                        | 40             | 41.5           |
| Cer 24:0                       | 648.9 > 264.4                                                                                        | 40             | 38.5           |
| DHCer 16:0                     | 540.4 > 266.4                                                                                        | 40             | 33.0           |
| DHCer 18:1                     | 568.5 > 266.4                                                                                        | 40             | 35.0           |
| DHCer 18:0                     | 566.5 > 266.4                                                                                        | 40             | 35.0           |
| DHCer 24:1                     | 652.5 > 266.4                                                                                        | 40             | 40.0           |
| DHCer 24:0                     | 650.5 > 266.4                                                                                        | 40             | 38.5           |
| Sm 12:0 (IS) <sup>2</sup>      | 649.6 > 184.1                                                                                        | 40             | 50.0           |
| Sm 16:0                        | 705.6 > 184.1                                                                                        | 40             | 50             |
| Sm 18:0                        | 733.6 > 184.1                                                                                        | 40             | 50             |
| Sm 18:1                        | 731.6 > 184.1                                                                                        | 40             | 50             |
| Sm 24:0                        | 817.6 > 184.1                                                                                        | 40             | 50             |
| Sm 24:1                        | 815.6 > 184.1                                                                                        | 40             | 50             |

<sup>1</sup> IS: internal standard for ceramides and dihydroceramides

<sup>2</sup> IS: internal standard for sphingomyelins
